# Supplementary material for: Tuning the properties of injectable poly(oligoethylene glycol methacrylate) hydrogels by controlling precursor polymer molecular weight
Source: Royal Society of Chemistry journal article supplement (doi:10.1039/c6tb02197b), 2016-01-01
Supplement: c6tb02197b1.pdf [file c6tb02197b1.pdf]

**Supporting Information**

**Tuning the Properties of Injectable Poly(Oligoethylene Glycol Methacrylate) Hydrogels by Controlling Precursor Polymer Molecular Weight**

Ivan Urosev<sup>a</sup>, Emilia Bakaic<sup>b</sup>, Richard J Alsop<sup>c</sup>, Maikel C. Rheinstädter<sup>c</sup> and Todd

Hoare<sup>a,b\*</sup>

-----

I. Urosev, E. Bakaic, R.J. Alsop, Dr. M.C. Rheinstädter, Dr. T. Hoare

<sup>a</sup> School of Biomedical Engineering, <sup>b</sup> Department of Chemical Engineering,

<sup>c</sup> Department of Physics and Astronomy

McMaster University, 1280 Main St. W. Hamilton, ON L8S 4L8, Canada

E-mail: [hoaretr@mcmaster.ca](mailto:hoaretr@mcmaster.ca)

-----

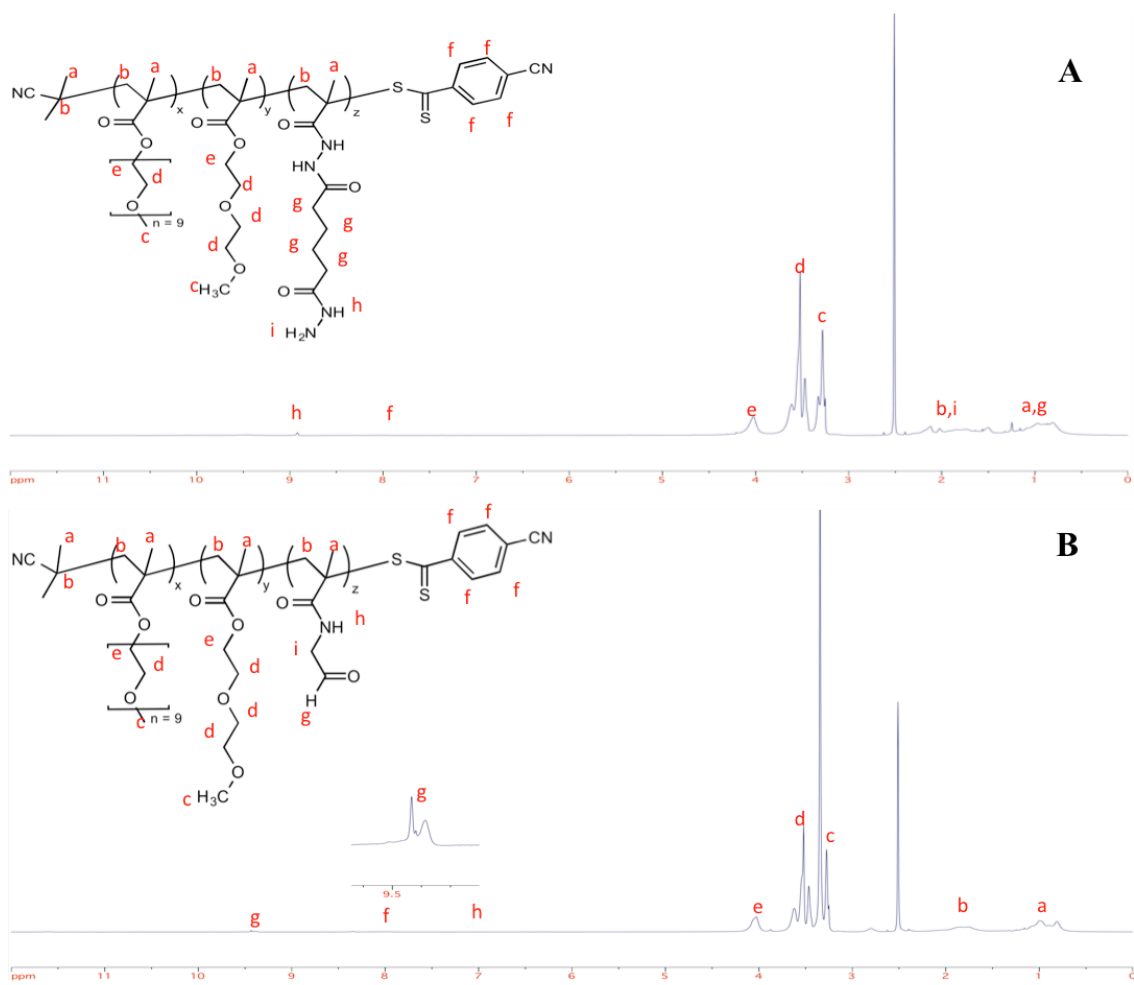

**Figure S1.**  $^1\text{H}$  NMR of POH<sub>15.9</sub> (A) and POA<sub>15.0</sub> (B) in DMSO at 600 MHz.

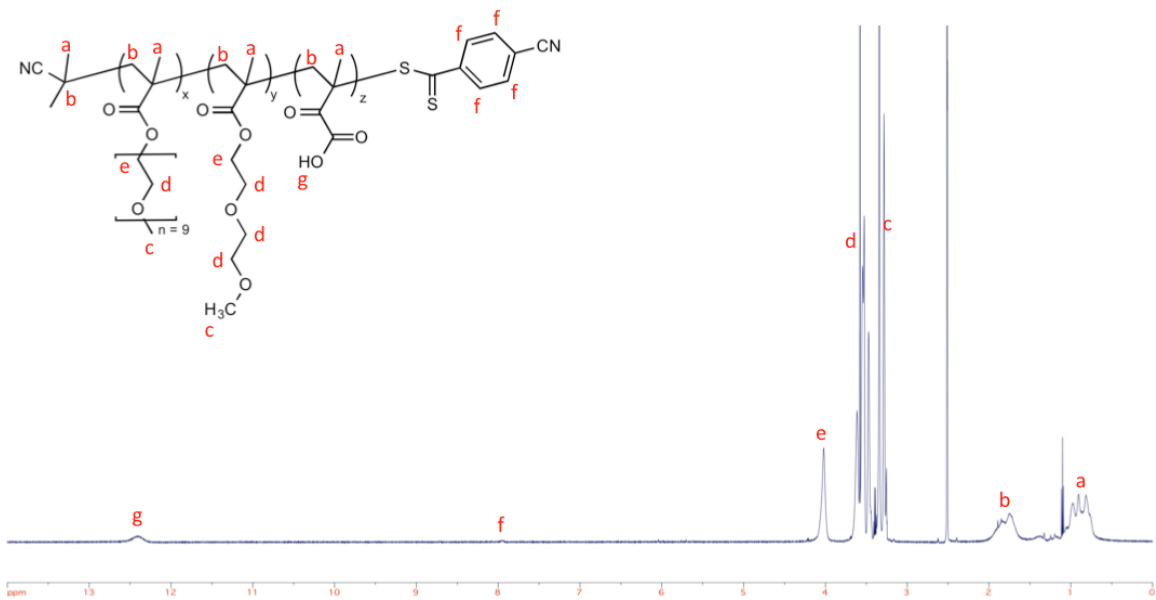

**Figure S2.**  $^1\text{H}$  NMR of unfunctionalized POEGMA-co-MAA in DMSO at 600 MHz.

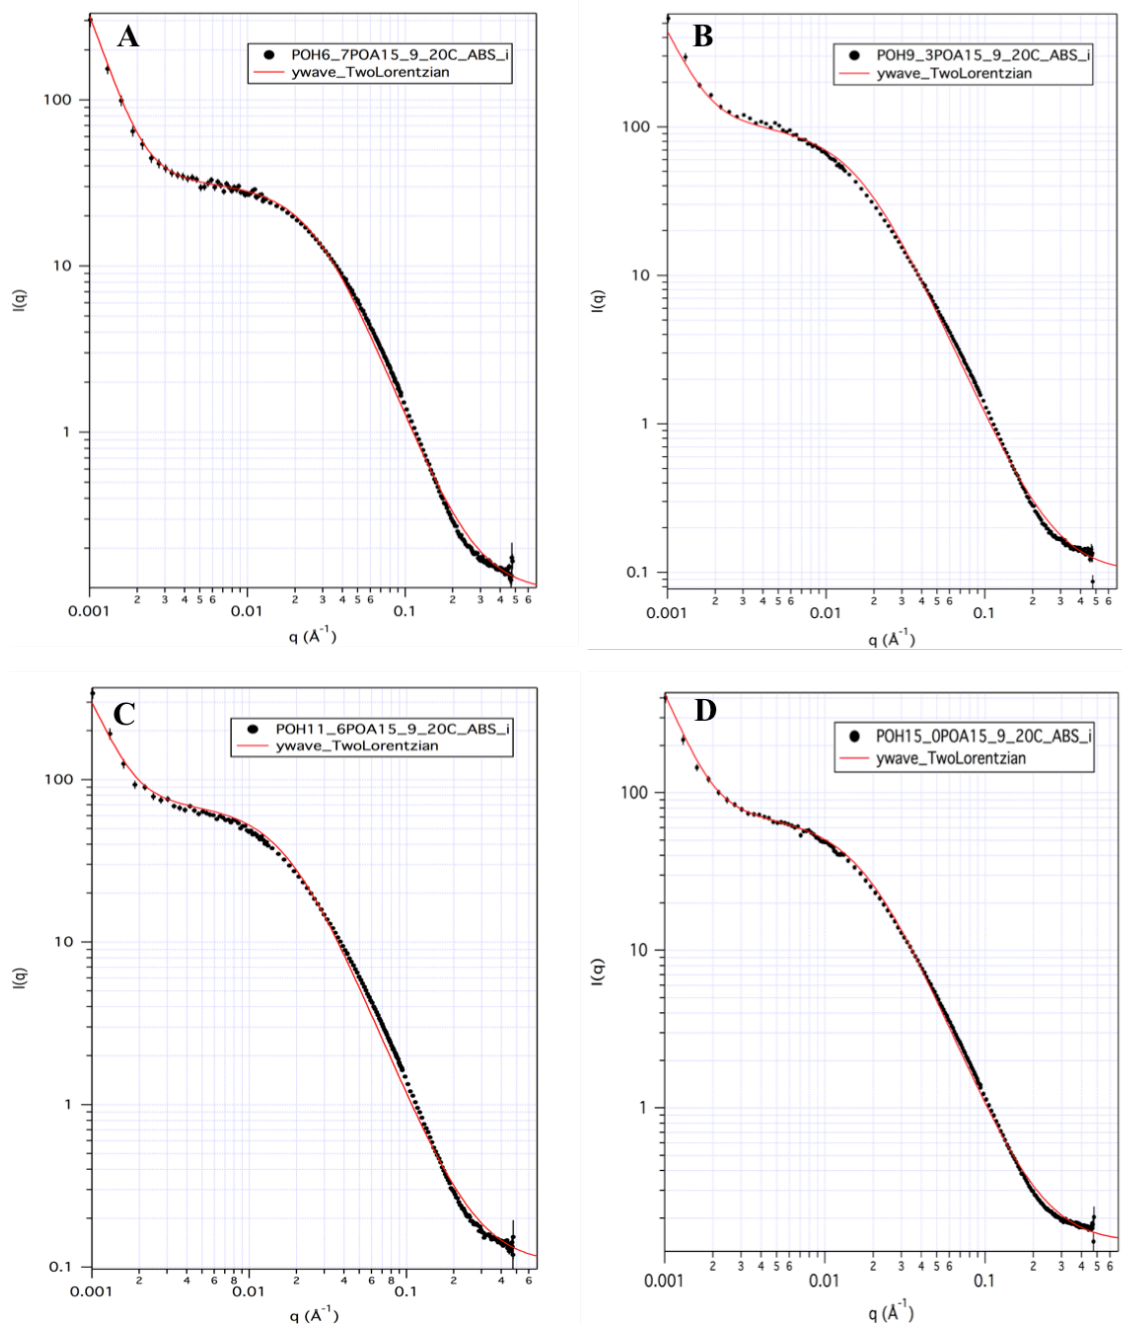

**Figure S3.** Scattering intensities as a function of  $q$  for POH<sub>6.7</sub>/POA<sub>15.9</sub> (A), POH<sub>9.3</sub>/POA<sub>15.9</sub> (B), POH<sub>11.6</sub>/POA<sub>15.9</sub> (C), and POH<sub>15.0</sub>/POA<sub>15.9</sub> (D) at 20 °C. The Ornstein-Zernike (OZ) – squared Lorentzian (SL) fits of the scattering intensities are shown as red solid lines, while the raw SANS data is shown as black points.

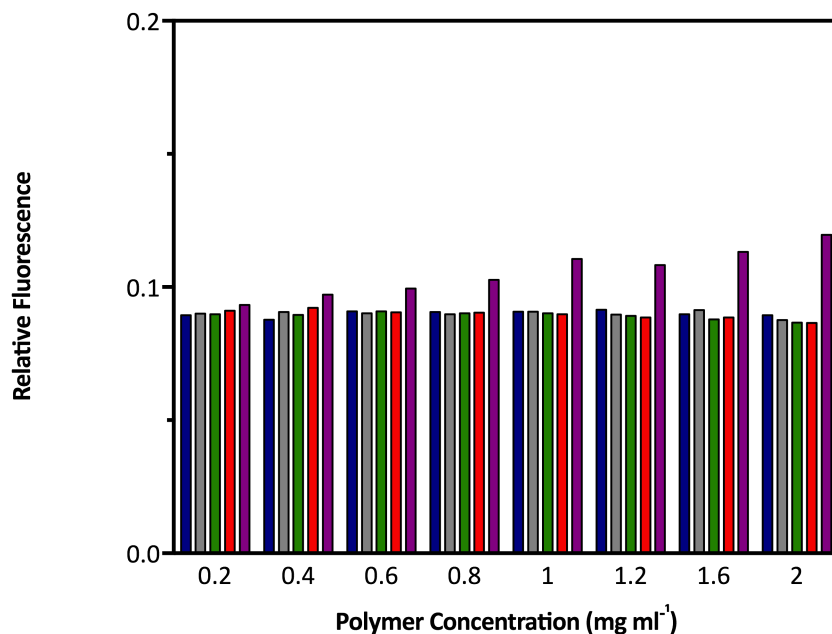

**Figure S4.** Fluorescence readings of wells containing resazurin (10  $\mu\text{g/ml}$ ) + DMEM + one of: POH<sub>6.7</sub> (blue), POH<sub>9.3</sub> (grey), POH<sub>11.6</sub> (green), POH<sub>15.9</sub> (red) and POA<sub>15.0</sub> (purple) at concentrations ranging from 0.2 – 2  $\text{mg ml}^{-1}$  as a proportion of the fluorescence readings from control wells containing only cells, DMEM, and resazurin.
